# Supplementary material
Source: publisher figshare collection journal article supplement (https://tandf.figshare.com/ndownloader/files/20021231)
Supplement: Supplementary file 1 [file 20021231]

Supplementary table A. *Prevalence rates of children`s traumatic experiences by gender and age.*

| **Traumatic event types** | **Girls**  **(n = 109)**  ***n %*** | | **Boys**  **(n = 121)**  ***n %*** | | **Gender**  **Difference**  ***Χ2*** | **7 – 11 yrs.**  **(n = 75)**  ***n %*** | | **12 – 15 yrs.**  **(n = 155)**  ***n %*** | | **Age**  **Difference**  ***Χ2*** |
| --- | --- | --- | --- | --- | --- | --- | --- | --- | --- | --- |
| Death of a close person | 96 | 88.1 | 98 | 81.0 | 2.18 | 57 | 76.0 | 137 | 88.4 | 5.87* |
| Saw someone who was beaten up, shot at or killed | 62 | 56.9 | 66 | 54.5 | 0.13 | 42 | 56.0 | 86 | 55.5 | 0.01 |
| Dangerous flight | 52 | 47.7 | 53 | 43.8 | 0.35 | 26 | 34.7 | 79 | 51.0 | 5.41* |
| Deprivation of food | 38 | 34.9 | 54 | 44.6 | 2.28 | 20 | 26.7 | 72 | 46.5 | 8.24** |
| Natural disaster | 37 | 33.9 | 46 | 38.0 | 0.41 | 29 | 38.7 | 54 | 34.8 | 0.32 |
| Violent death or serious injury of a loved one or friend | 46 | 42.2 | 36 | 29.8 | 3.87* | 27 | 36 | 55 | 35.5 | 0.01 |
| Being very close to burning houses | 40 | 36.7 | 42 | 34.7 | 0.10 | 36 | 48.0 | 46 | 29.7 | 7.40** |
| Beaten up, shot at or threatened to be hurt badly in school, neighborhood or town | 30 | 27.5 | 49 | 40.5 | 4.28* | 22 | 29.3 | 57 | 36.8 | 1.24 |
| Close to crossfire or shootings | 32 | 29.4 | 42 | 34.7 | 0.75 | 21 | 28.0 | 53 | 34.2 | 0.89 |
| Saw people with mutilations or dead bodies | 30 | 27.5 | 44 | 36.4 | 2.05 | 25 | 33.3 | 49 | 31.6 | 0.07 |
| Saw a family member being hit very hard at home | 34 | 37.7 | 35 | 28.9 | 0.14 | 22 | 29.3 | 47 | 30.3 | 0.02 |
| Severe accident | 32 | 29.4 | 32 | 26.4 | 0.24 | 19 | 25.3 | 45 | 29.0 | 0.34 |
| Harassment by armed personnel (witnessed) | 26 | 23.9 | 38 | 31.4 | 1.63 | 24 | 32.0 | 40 | 25.8 | 0.97 |
| Close to a war zone | 27 | 24.8 | 36 | 29.8 | 0.72 | 16 | 21.3 | 47 | 30.3 | 2.05 |
| **Traumatic event types** | **Girls**  **(n = 109)**  ***n %*** | | **Boys**  **(n = 121)**  ***n %*** | | **Gender**  **Difference**  ***Χ2*** | **7 – 11 yrs.**  **(n = 75)**  ***n %*** | | **12 – 15 yrs.**  **(n = 155)**  ***n %*** | | **Age**  **Difference**  ***Χ2*** |
| Hit very hard at school by a teacher | 30 | 27.5 | 33 | 27.3 | 0.00 | 16 | 21.3 | 47 | 30.3 | 2.05 |
| Close to a combat situation | 20 | 18.3 | 28 | 23.1 | 0.80 | 13 | 17.3 | 35 | 22.6 | 0.84 |
| Robbery or looting by armed personnel (witnessed) | 19 | 17.4 | 28 | 23.1 | 1.15 | 11 | 14.7 | 36 | 23.2 | 2.28 |
| Beatings or torture by armed personnel (witnessed) | 14 | 12.8 | 32 | 26.4 | 6.63** | 16 | 21.3 | 30 | 19.4 | 0.12 |
| Close to a bomb/grenade attack | 21 | 19.3 | 24 | 19.8 | 0.01 | 16 | 21.3 | 29 | 18.7 | 0.22 |
| Severe injury by weapon by armed personnel (witnessed) | 15 | 13.8 | 27 | 22.3 | 2.81 | 11 | 14.7 | 31 | 20.0 | 0.96 |
| Forced payment of taxes to armed personnel | 13 | 11.9 | 15 | 12.4 | 0.01 | 8 | 10.7 | 20 | 12.9 | 0.24 |
| Painful or scary medical treatment for severe sickness/injury | 13 | 11.9 | 14 | 12.8 | 0.01 | 6 | 8.0 | 21 | 13.5 | 1.50 |
| Forceful abduction or recruitment of a close person | 8 | 7.3 | 12 | 9.9 | 0.48 | 5 | 6.7 | 15 | 9.7 | 0.58 |
| Robbery or looting by armed personnel | 8 | 7.3 | 11 | 9.1 | 0.23 | 2 | 2.7 | 17 | 11.0 | 4.60* |
| Other scary or upsetting event | 9 | 8.3 | 8 | 6.6 | 0.23 | 3 | 4.0 | 14 | 9.0 | 1.87 |
| Rape of a woman, man or child (witnessed) | 7 | 6.4 | 9 | 7.4 | 0.09 | 3 | 4.0 | 13 | 8.4 | 1.50 |
| Unwanted touching of private parts | 11 | 10.1 | 2 | 1.7 | 7.66** | 3 | 4.0 | 10 | 6.5 | 0.57 |
| Beatings or torture by armed personnel | 4 | 3.7 | 7 | 5.8 | 0.56 | 2 | 2.7 | 9 | 5.8 | 1.09 |
| Harassment by armed personnel | 6 | 5.5 | 4 | 3.3 | 0.67 | 0 | 0.0 | 10 | 6.5 | 5.06* |
| Forced prostitution or sexual slavery (witnessed) | 7 | 6.4 | 2 | 1.7 | 3.47 | 2 | 2.7 | 7 | 4.5 | 0.46 |
| **Traumatic event types** | **Girls**  **(n = 109)**  ***n %*** | | **Boys**  **(n = 121)**  ***n %*** | | **Gender**  **Difference**  ***Χ2*** | **7 – 11 yrs.**  **(n = 75)**  ***n %*** | | **12 – 15 yrs.**  **(n = 155)**  ***n %*** | | **Age**  **Difference**  ***Χ2*** |
| Forced to have sex with someone | 5 | 4.6 | 2 | 1.7 | 1.67 | 1 | 1.3 | 6 | 3.9 | 1.10 |
| Imprisonment | 2 | 1.8 | 4 | 3.3 | 0.49 | 2 | 2.7 | 4 | 2.6 | 0.00 |
| Injury by weapon by armed personnel | 3 | 2.8 | 0 | 0.0 | 3.37 | 1 | 1.3 | 2 | 1.3 | 0.00 |
| Forceful abduction or recruitment | 0 | 0.0 | 2 | 1.7 | 1.82 | 0 | 0.0 | 2 | 1.3 | 0.98 |

*Note*: Traumatic event types are sorted by total frequency in descending order. No alpha-level correction was applied for comparisons by gender and age.

**p* ≤ 0.05, ***p* ≤ 0.01

Supplementary table B. *Prevalence rates of traumatic experiences for children, mothers and fathers*

| **Traumatic event types** | **Children**  **(*n* = 230)**  ***n %*** | | **Mothers**  **(*n* = 230)**  ***n %*** | | **Fathers**  **(*n* = 230)**  ***n %*** | |
| --- | --- | --- | --- | --- | --- | --- |
| Death of a close person | 194 | 84.3 | - | - | - | - |
| Saw someone who was beaten up, shot at or killed | 128 | 55.7 | - | - | - | - |
| Dangerous flight | 105 | 45.7 | 184 | 80.0 | 206 | 89.6 |
| Deprivation of food | 92 | 40.0 | 184 | 80.0 | 181 | 78.7 |
| Natural disaster | 83 | 36.1 | 115 | 50.0 | 126 | 54.8 |
| Violent death or serious injury of a loved one or friend | 82 | 35.7 | - | - | - | - |
| Being very close to burning houses | 82 | 35.7 | 209 | 90.9 | 203 | 88.3 |
| Beaten up, shot at or threatened to be hurt badly in school, neighborhood or town | 79 | 34.3 | - | - | - | - |
| Close to crossfire or shootings | 74 | 32.2 | 199 | 86.5 | 211 | 91.7 |
| Saw people with mutilations or dead bodies | 73 | 32.2 | 181 | 78.7 | 204 | 88.7 |
| Saw a family member being hit very hard at home | 69 | 30.0 | - | - | - | - |
| Severe accident | 64 | 27.8 | 90 | 39.1 | 139 | 60.4 |
| Harassment by armed personnel (witnessed) | 64 | 27.8 | 164 | 71.3 | 198 | 86.1 |
| Close to a war zone | 63 | 27.4 | - | - | - | - |
| Hit very hard at school by a teacher | 63 | 27.4 | - | - | - | - |
| Close to a combat situation | 48 | 20.9 | 189 | 82.2 | 208 | 90.4 |
| Robbery or looting by armed personnel (witnessed) | 47 | 20.4 | 130 | 56.5 | 173 | 75.2 |
| Beatings or torture by armed personnel (witnessed) | 46 | 20.0 | 147 | 63.9 | 195 | 84.8 |
| Close to a bomb/grenade attack | 45 | 19.6 | 181 | 78.7 | 206 | 89.6 |
| Severe injury by weapon by armed personnel (witnessed) | 42 | 18.3 | 183 | 79.6 | 212 | 92.2 |
| Forced payment of taxes to armed personnel | 28 | 12.2 | 128 | 55.7 | 154 | 67.0 |
| Painful or scary medical treatment for severe sickness/injury | 27 | 11.7 | - | - | - | - |
| Forceful abduction or recruitment of a close person | 20 | 8.7 | 134 | 58.3 | 167 | 72.6 |
| Robbery or looting by armed personnel | 19 | 8.3 | 121 | 52.6 | 143 | 62.2 |
| Rape or sexual assault | 17 | 7.4 | 48 | 20.9 | 16 | 7.0 |
| **Traumatic event types** | **Children**  **(*n* = 230)**  ***n %*** | | **Mothers**  **(*n* = 230)**  ***n %*** | | **Fathers**  **(*n* = 230)**  ***n %*** | |
| Other scary or upsetting event | 17 | 7.4 | - | - | - | - |
| Rape of a woman, man or child (witnessed) | 16 | 7.0 | 78 | 33.9 | 68 | 29.6 |
| Beatings or torture by armed personnel | 11 | 4.8 | 76 | 33.0 | 150 | 65.2 |
| Harassment by armed personnel | 10 | 4.3 | 115 | 50.0 | 175 | 76.1 |
| Forced prostitution or sexual slavery (witnessed) | 9 | 3.9 | 75 | 32.6 | 70 | 30.4 |
| Imprisonment | 6 | 2.6 | 27 | 11.7 | 98 | 42.6 |
| Injury by weapon by armed personnel | 3 | 1.3 | 17 | 7.4 | 72 | 31.3 |
| Forceful abduction or recruitment | 2 | .9 | 35 | 15.2 | 91 | 39.6 |
| Fought in a combat | - | - | 3 | 1.3 | 32 | 13.9 |
| Severe accident (witnessed) | - | - | 181 | 78.7 | 202 | 87.8 |
| Severe accident (caused) | - | - | 19 | 8.3 | 43 | 18.7 |
| Life threatening illness or injury | - | - | 132 | 57.4 | 152 | 66.1 |
| Life-threatening illness or injury of a close person | - | - | 181 | 78.7 | 198 | 86.1 |
| Suicide (witnessed) | - | - | 65 | 28.3 | 58 | 25.2 |
| Forced payment of taxes to armed personnel (witnessed) | - | - | 150 | 65.2 | 182 | 79.1 |
| Killing or murder of someone (witnessed) | - | - | 124 | 53.9 | 154 | 67.0 |
| Robbed or looted another person | - | - | 4 | 1.7 | 18 | 7.8 |
| Severely beat or tortured another person | - | - | 10 | 4.3 | 29 | 12.6 |
| Assaulted someone with a weapon | - | - | 2 | 0.9 | 17 | 7.4 |
| Abducted or recruited someone by force | - | - | 5 | 2.2 | 8 | 3.5 |
| Raped or sexually assaulted someone | - | - | 3 | 1.3 | 13 | 5.7 |
| Killed someone | - | - | 0 | 0 | 11 | 4.8 |

*Note*: For children, traumatic event types are sorted by frequency in descending order; for parents, traumatic event types are listed in random order.

|  | **Children (n = 230)**  ***% n M SD*** | | | | **Mothers (n = 230)**  ***% n M SD*** | | | | **Fathers (n = 230)**  ***% n M SD*** | | | |
| --- | --- | --- | --- | --- | --- | --- | --- | --- | --- | --- | --- | --- |
| PTSD Measures  DSM-5 diagnosis  Symptom severity  Functional Impairment | 5.7a (2.2)b  42.6 | 13 (5)  98 | 14.59a | 11.33 | 32.6c  50.9 | 75  117 | 38.51c | 19.31 | 29.1c  50.4 | 67  116 | 33.04c | 16.51 |
| SDQ  Total difficulties score  Internalizing problems  Externalizing problems | 10.9d  16.5f  1.3h | 25  38  3 | 10.65  6.33  4.32 | 5.06  3.26  2.92 | 15.9e  27.8g  3.1h | 36  63  7 | 10.84  6.26  4.59 | 6.04  3.74  3.25 | 11.5e  11.0g  5.3h | 26  25  12 | 9.30  4.67  4.63 | 5.56  3.29  3.57 |
| BSI-18  Global Severity Index  Somatization  Depression  Anxiety |  |  |  |  | 87.4i  75.2k 85.2m  72.6k | 201  173  196  167 | 31.21  10.12  11.08  10.01 | 16.49  5.97  5.94  6.29 | 83.9j  62.6l  77.8n  66.5o | 193  144  179  153 | 24.53  6.92  9.50  8.11 | 14.29  5.11  5.39  5.78 |

**Supplementary table C.** *Prevalence of PTSD and other mental health problems among children and parents*

*Note*: The SDQ values in the parent columns refer to the SDQ parent version. PTSD, posttraumatic stress disorder; SDQ, Strengths and Difficulties Questionnaire; BSI-18, Brief Symptom Inventory-18; SDQ cut-off scores are based on Goodman et al. (2000); BSI-18 cut-off scores are based on Derogatis (2000); Median scores of PTSD measures were 13.00 (children), 38.00 (mothers) and 33.00 (fathers).

a Assessed with the University of California at Los Angeles Child/Adolescent PTSD Reaction Index for DSM-5. b Prevalence of Dissociative Subtype. c Assessed with the PTSD Check List for DSM-5; d Cut-off ≥ 18; e Cut-off ≥ 17; f Cut-off ≥ 10; g Cut-off ≥ 9; h Cut-off ≥ 12; i Cut-off ≥ 13; j Cut-off ≥ 10; k Cut-off ≥ 6; l Cut-off ≥ 5; m Cut-off ≥ 5; n Cut-off ≥ 5; o Cut-off ≥ 5.

Supplementary table D. *Sociodemographic characteristics of latent classes*

| **Characteristics** | **Traumatized families**  **(35.4%, *n* = 80)** | | | **Traumatized mothers**  **(20.8%, *n* = 47)** | | | **Traumatized fathers**  **(16.4%, *n* = 37)** | | | **Non-traumatized families**  **(27.4%, *n* = 62)** | | |
| --- | --- | --- | --- | --- | --- | --- | --- | --- | --- | --- | --- | --- |
| **Children** | **Mothers** | **Fathers** | **Children** | **Mothers** | **Fathers** | **Children** | **Mothers** | **Fathers** | **Children** | **Mothers** | **Fathers** |
| Camp, % (*n*)  Mtendeli  Nduta  Nyarugusu | 27.4 (22)  36.3 (29)  36.3 (29) | | | 36.2 (17)  34.0 (16)  29.8 (14) | | | 35.1 (13)  32.4 (12)  32.4 (12) | | | 22.6 (14)  30.6 (19)  46.8 (29) | | |
| Age, M (SD) | 12.46 (2.09) | 35.04 (8.17) | 43.10 (10.49) | 11.94 (1.97) | 33.79 (8.22) | 39.60 (9.49) | 11.51 (2.13) | 33.24 (7.38) | 38.59 (9.58) | 12.13 (1.93) | 35.39 (9.59) | 42.87  (12.76) |
| Country of birth, *%* (*n*)  Burundi  Tanzania  Other | 57.5 (46)  42.5 (34)  0 | 93.8 (75)  1.2 (1)  4.0 (4) | 90.0 (72)  7.5 (6)  2.5 (2) | 72.3 (34)  27.7 (13)  0 | 91.5 (43)  8.5 (4)  0 | 91.5 (43)  8.5 (4)  0 | 78.4 (29)  21.6 (8)  0 | 94.6 (35)  2.7 (1)  2.7 (1) | 94.6 (35)  2.7 (1)  2.7 (1) | 61.3 (38)  38.7 (24)  0 | 90.3 (56)  4.8 (3)  4.9 (3) | 88.7 (55)  9.7 (6)  1.6 (1) |
| Relationship to child, *%* (*n*)  Biological Parent  Relative  Step parent  Foster parent |  | 83.8 (67)  7.6 (6)  2.5 (2)  6.3 (5) | 81.3 (65)  6.3 (5)  3.8 (3)  8.8 (7) |  | 85.1 (40)  4.2 (2)  2.1 (1)  8.5 (4) | 83.0 (39)  8.5 (4)  0  8.5 (4) |  | 89.2 (33)  0  2.7 (1)  8.1 (3) | 83.8 (3)  0  10.8 (4)  5.4 (2) |  | 85.5 (83)  8.0 (5)  4.8 (3)  1.6 (1) | 90.3 (56)  6.4 (4)  1.6 (1)  1.6 (1) |
| **Characteristics** | **Traumatized families**  **(35.4%, *n* = 80)** | | | **Traumatized mothers**  **(20.8%, *n* = 47)** | | | **Traumatized fathers**  **(16.4%, *n* = 37)** | | | **Non-traumatized families**  **(27.4%, *n* = 62)** | | |
| **Children** | **Mothers** | **Fathers** | **Children** | **Mothers** | **Fathers** | **Children** | **Mothers** | **Fathers** | **Children** | **Mothers** | **Fathers** |
| Educational level, *%* (*n*)a  No schooling  Primary school, class 1 – 3  class 4 - 6  Some secondary school  Secondary school | 12.5 (10)  38.7 (31) 48.8 (39) | 28.7 (23)  20.1 (16)  38.8 (31)  12.5 (10)  0 | 27.5 (22)  11.3 (9)  31.3 (25)  21.4 (17)  8.9 (7) | 10.6 (5)  59.5 (28) 29.8 (14) | 34.0 (16)  27.6 (13)  25.5 (12)  10.6 (5)  2.1 (1) | 27.7 (13)  21.3 (10)  31.9 (15)  12.8 (6)  6.4 (3) | 8.1 (3)  64.8 (24) 27.0 (10) | 45.9 (17)  18.9 (7)  24.3 (9)  8.1 (3)  2.7 (1) | 18.9 (7)  18.9 (7)  51.3 (19)  10.8 (4)  0 | 10.3 (7)  48.4 (30) 40.3 (25) | 38.7 (24)  24.2 (15)  27.4 (17)  9.7 (6)  0 | 17.7 (11)  17.7 (11)  50.0 (31)  12.9 (8)  1.6 (1) |
| Number of people in household, *%* (*n*)b  3 to 5  6 to 9  10 or more | 12.5 (10)  62.5 (50)  25.0 (20) | | | 14.9 (7)  78.7 (37)  6.4 (3) | | | 18.9 (7)  67.5 (25)  13.5 (5) | | | 14.5 (9)  74.2 (46)  11.3 (7) | | |
| Average household income p. month (USD)b  No income  Up to 20  More than 20 | 12.5 (10)  82.5 (66)  5.0 (4) | | | 17.0 (8)  78.8 (37)  4.3 (2) | | | 16.2 (6)  81.0 (30)  2.7 (1) | | | 17.7 (11)  75.9 (47)  6.5 (4) | | |

a Children`s responses referred to their current level, parents` responses to the highest level they achieved. b Information on household variables is averaged across mothers` and fathers` report
